# Supplementary material for: Genome-Wide Identification and Characterization of Bovine Fibroblast Growth Factor (FGF) Gene and Its Expression during Adipocyte Differentiation
Source: MDPI journal article supplement (doi:10.3390/ijms24065663), 2023-03-16
Supplement: s1 [file s1]

Motif 1

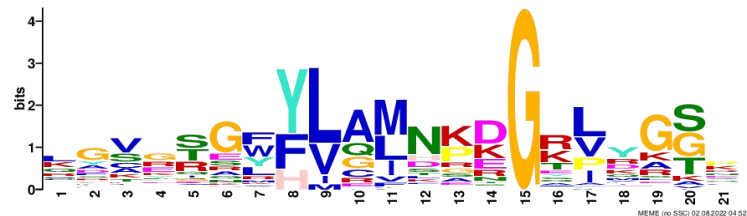

Motif 2

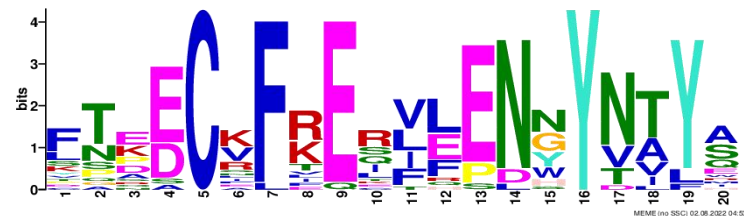

Motif 3

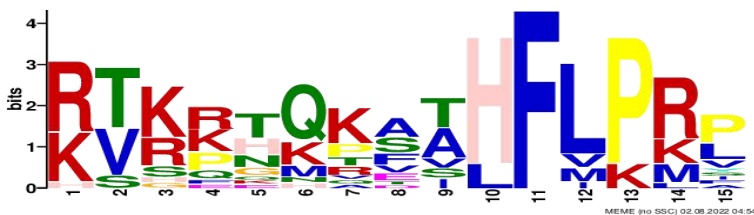

Motif 4

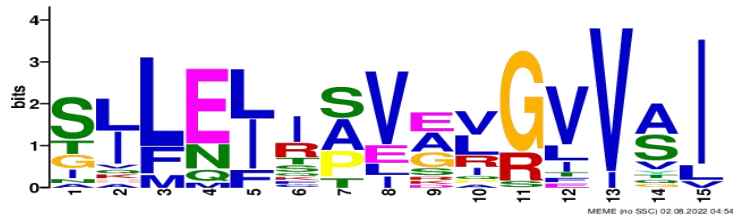

Motif 5

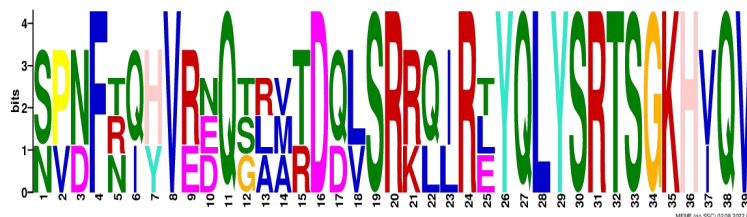

Motif 6

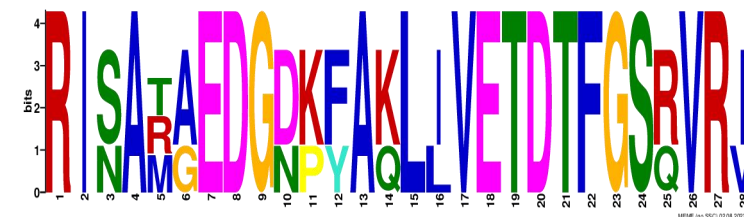

Motif 7

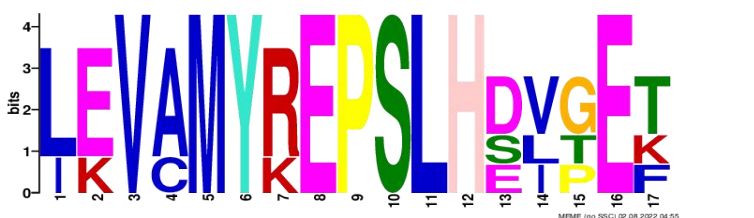

Motif 8

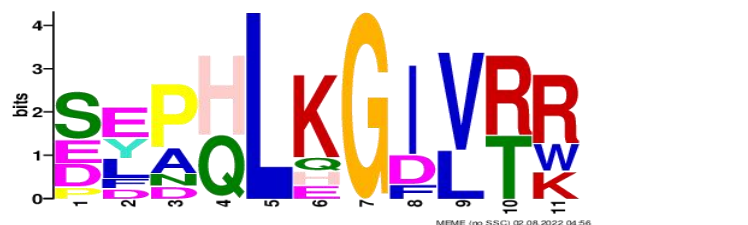

Motif 9

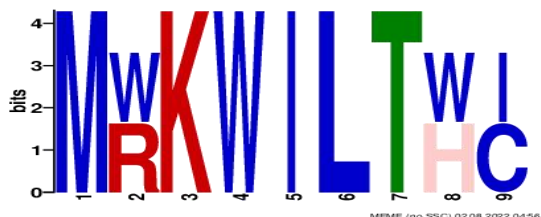

Motif 10

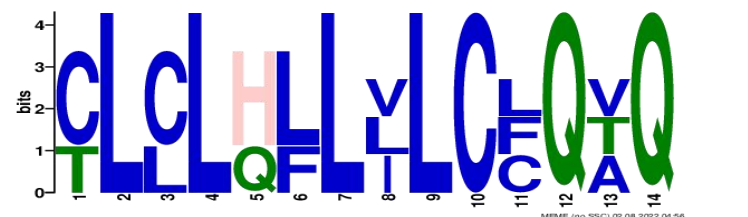

Amino acid sequence

Amino acid sequence
