# Supplementary figures and images for: Genome-Wide Identification and Characterization of Bovine Fibroblast Growth Factor (FGF) Gene and Its Expression during Adipocyte Differentiation
Source: MDPI journal article supplement (doi:10.3390/ijms24065663), 2023-03-16

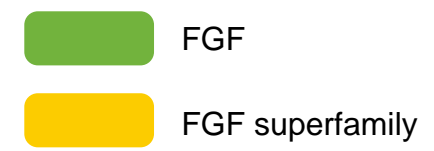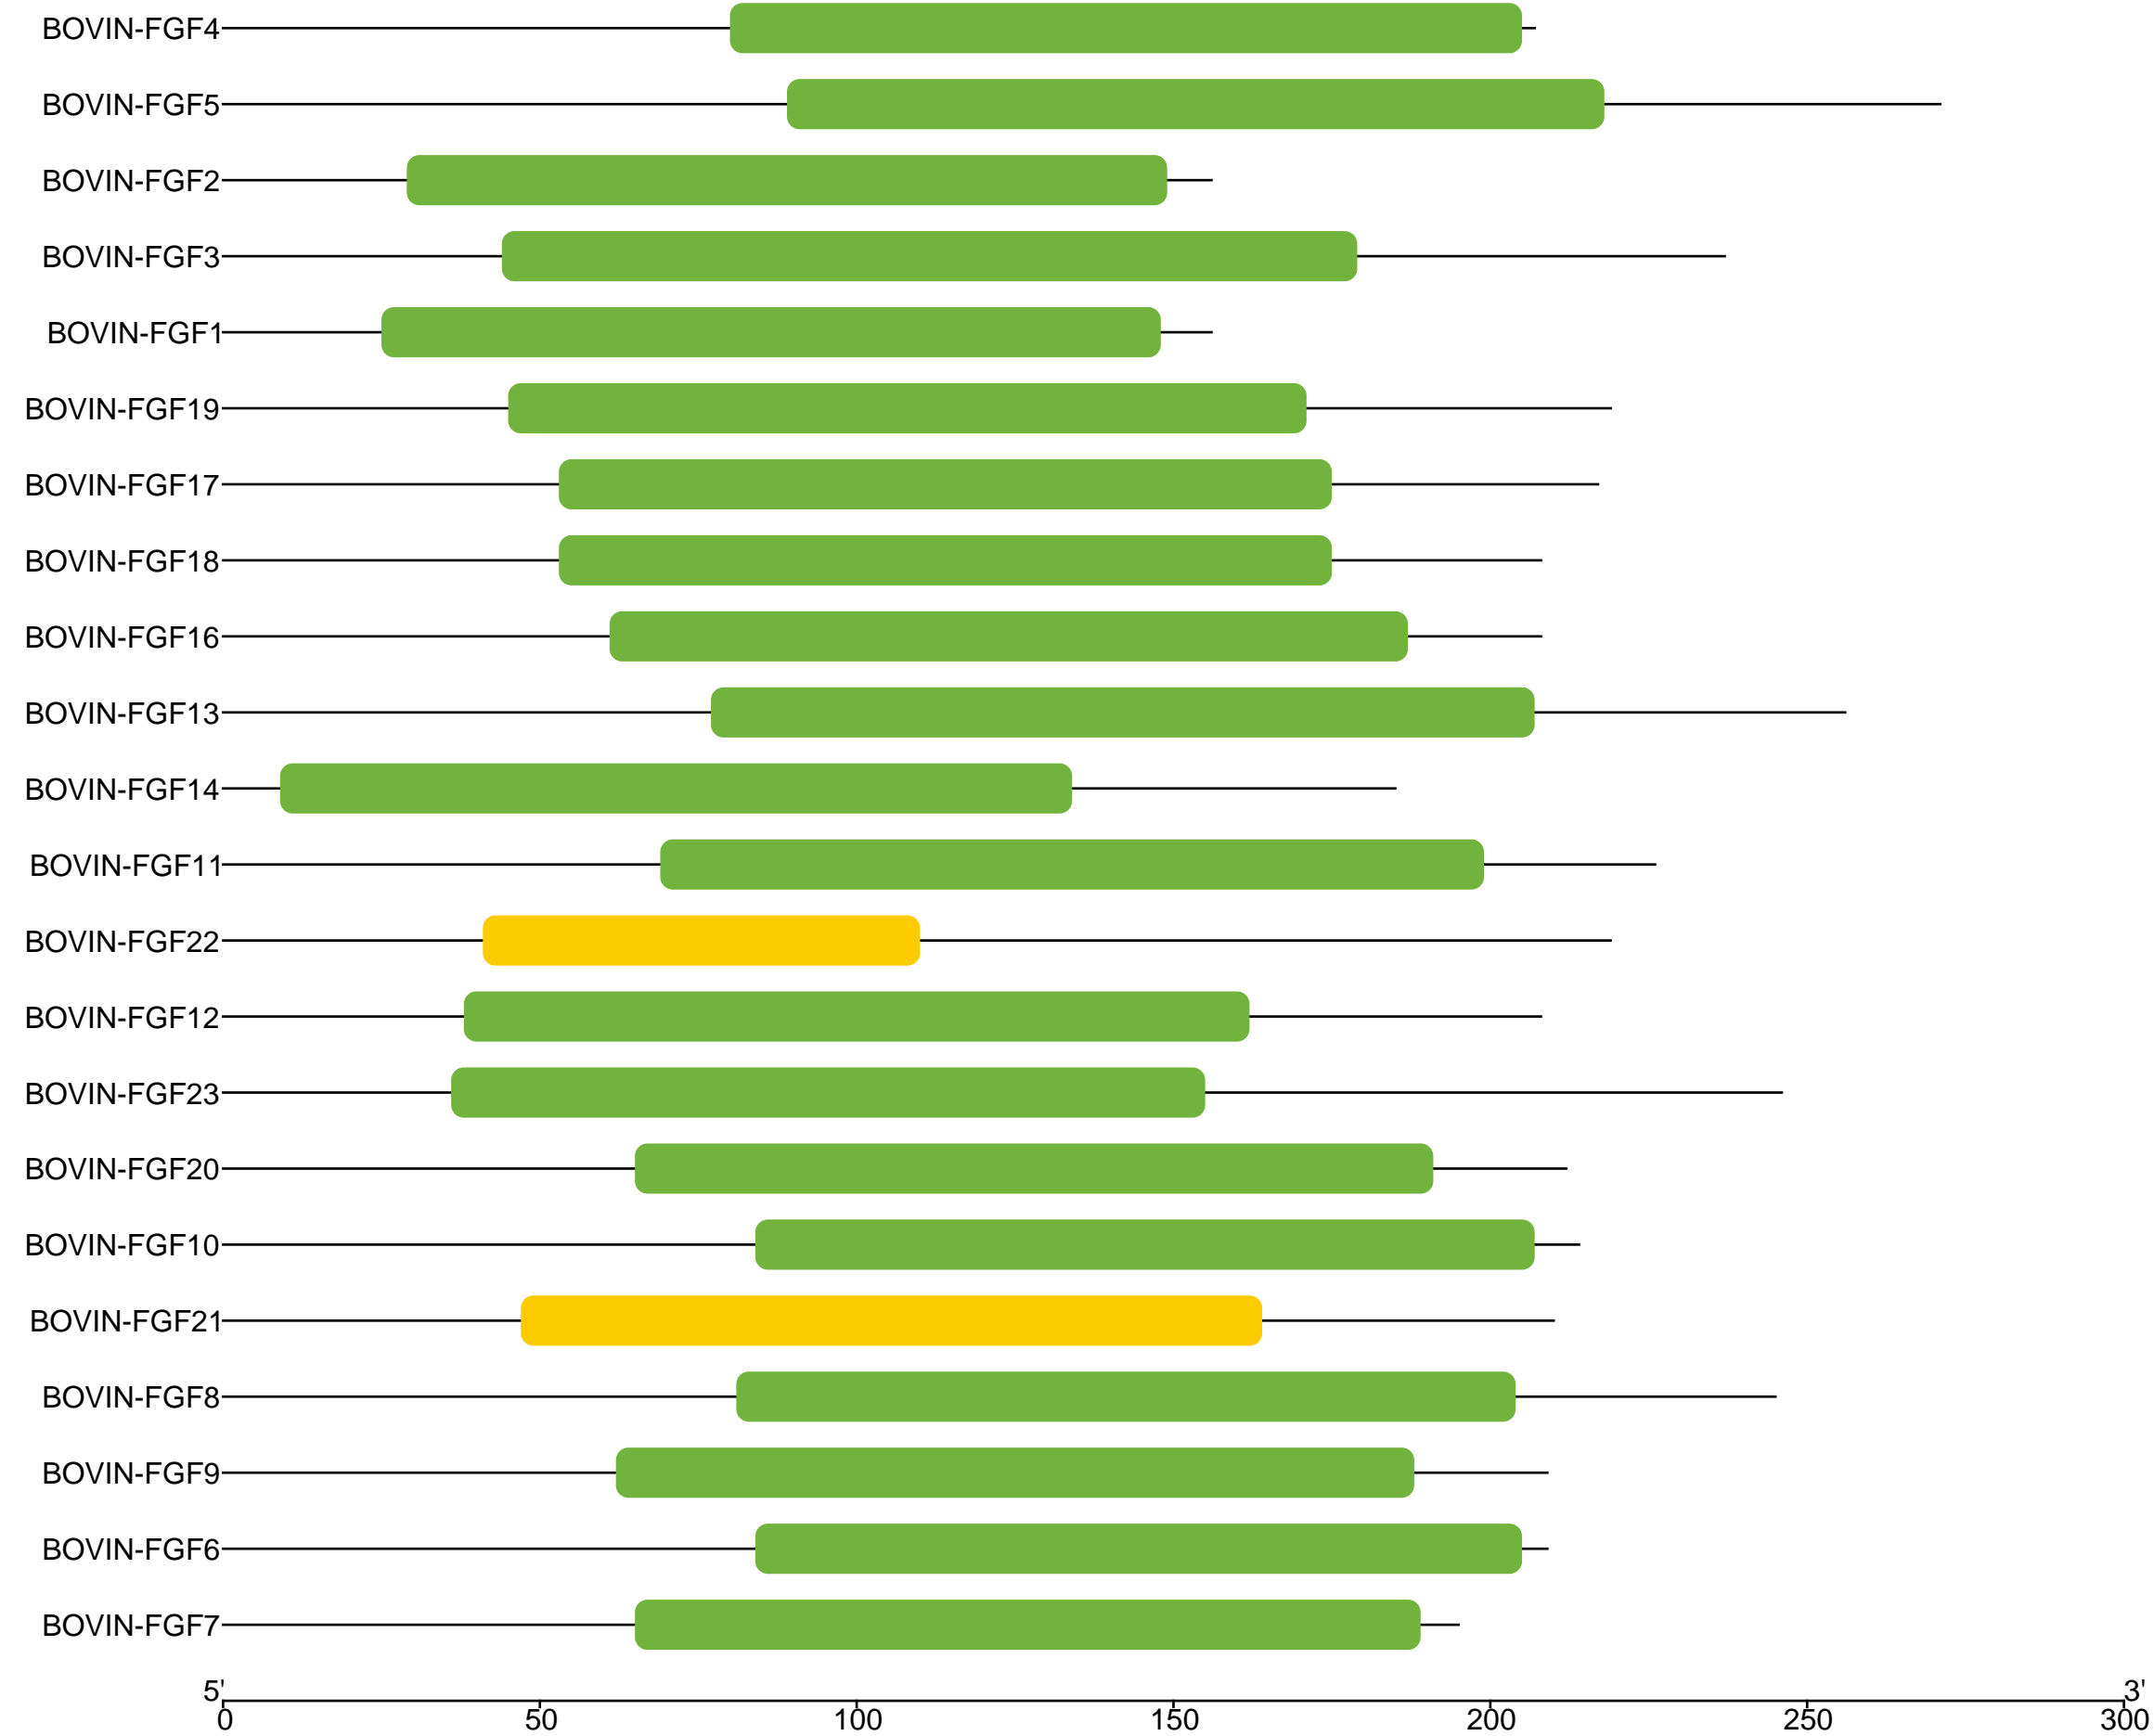

Supplement: s1 [file s1]
